# Supplementary material for: Dichocarpum hagiangense—a new species and an updated checklist of Ranunculaceae in Vietnam
Source: PeerJ. 2020 Sep 22;8:e9874. doi: 10.7717/peerj.9874 (PMC7518158; doi:10.7717/peerj.9874)
Supplement: Supplemental Information 2 [file peerj-08-9874-s002.xlsx]

## Sheet: Sheet1
Dichocarpum hagiangensis	Length	Diameter	Wide	Quantity	Other
Rhizome (cm)	5	0.7
	4	0.7
	6.5	0.5
	8	0.7
	9	0.8
Scales (mm)	3		6
	2		5
	3		5
	3		6
	3		5
	2		6
	2		6
	3		5
	3		6
	2		5
	2		5
	3		6
	2		5
	2		5
	3		6
Leave				5	3-foliolate
					3
					3
					2
					3
				4	3
					3
					3
					1
				6	3
					3
					3
					1
					3
					3
				6	3
					3
					3
					3
					2
					3
				5	3
					3
					3
					3
					3
Petiole	5.5 cm	1.2 mm
	4.5	1
	6.4	1.3
	7.6	1.2
	4.9	1
	3.3	1.5
	9.2	1
	10	1.4
	10.5	1.1
	8.3	1.3
	6	1.2
	8.9	1.5
	5.7	1.4
	7.5	1.4
	4	1.2
	3.9	1.4
	9.7	1.5
	7.6	1.2
	6.9	1.4
	9.4	1.3
	9.8	1.3
	8.5	1.5
	7.5	1
	6.5	1.4
	7.5	1.5
	6	1.5
3-foliolate compound leaves
Lateral leaflets (cm)	3.1		2.4
	2.9		2
	2.6		2.3
	3		1.5
	3.5		1.9
	3.4		2.2
	2.8		1
	2.7		2
	3.1		1.5
	3.5		2.2
	3.2		1.3
	2.8		1.6
	3.5		2.1
	3.1		1.1
	2.9		2.2
	3		1.8
	3.6		2.3
	3.1		2
	2.5		0.8
	3		1
Petiolule	0.4 cm	1.2 mm
	0.7	1.2
	0.5	1.2
	0.3	1.2
	0.6	1.2
	0.5	1.2
	0.6	1.2
	0.5	1.2
	0.4	1.2
	0.5	1.2
	0.6	1.2
	0.5	1.2
	0.7	1.2
	0.6	1.2
	0.4	1.2
	0.3	1.2
	0.3	1.2
	0.5	1.2
	0.5	1.2
	0.7	1.2
Central leaflet (cm)	3	2.5
	3.5	2.4
	3.2	2.6
	3	2.7
	3.8	2.5
	4	2.8
	4	2.4
	3	2.6
	3.4	2.5
	4	2.8
	3.5	2.7
	3	2.5
	3.7	2.6
	3.2	2.4
	3.6	2.5
	3.1	2.7
	3.8	2.7
	4	2.8
	3	2.5
	4	2.8
Petiolule	1.5 cm	1.2 mm
	1.7	1.2
	0.8	1.2
	1.1	1.2
	1	1.2
	0.9	1.2
	1.2	1.2
	1.1	1.2
	1.6	1.2
	1.5	1.2
	1.3	1.2
	1.5	1.2
	1	1.2
	1.5	1.2
	1.7	1.2
	1.4	1.2
	1.3	1.2
	1.8	1.2
	0.7	1.2
	1.2	1.2
	1	1.2
2-foliolate compound leaves
Lower leaflet (cm)	5		3
	3.6		1.8
Petiolule	0.7 cm	1.5 mm
	0.3	1.2
Upper leaflet (cm)	4	2.5
	7	5.8
Petiolule	0.6 cm	1.2 mm
	0.8 cm	2
Simple leaves (cm)	2.9	2.5
	5.2	5.4
Flowering stem	12	1.5 mm
	14.5	1.5
	9.5	1.5
	14	1.5
	11.5	1.5
Inflorescences				6-flowered
				3
				5
				2
				5
Bract petioles (mm)	ca. 1‒2 mm	ca. 0.5 mm
Lower bracts (cm)	ca. 1	ca. 1
Upper bracts (cm)	ca. 0.4	ca. 0.4
Flowers (cm)		2.1
		2.2
		2.1
		2.3
		2
Pedicel (cm)	4
	9
	5
	6
	3
	1.7
	5
	6
	9
	8
	8
	7
	5
	7
	4
	6
	5
	7
	6
	5
	7
Sepals (mm)	10.5		5.5
	10.5		6
	11		6
	10.5		5.5
	10.5		6.5
	11		6.5
	11		5.5
	11		6
	11.5		7
	11		6
	11		5.5
	11.5		7
	11		6
	10.5		6
	11		6
	10.5		6
	11.5		6.5
	11		6.5
	11		6.5
	11.5		7
Petal limbs (mm)	1.2		1.6
	1.3		1.7
	1.4		1.7
	1.2		1.6
	1.3		1.7
	1.3		1.7
	1.3		1.7
	1.4		1.8
	1.3		1.7
	1.2		1.6
	1.3		1.7
	1.2		1.7
	1.4		1.8
	1.3		1.6
	1.2		1.6
	1.4		1.8
	1.2		1.7
	1.3		1.6
	1.4		1.8
	1.2		1.6
Claw (mm)	1.8
	2.2
	2.1
	2.3
	1.9
	2
	1.8
	2.3
	2.3
	2.2
	2.2
	2.1
	2.2
	2
	1.9
	2.2
	2.2
	2.1
	2
	2.3
Stamens (mm)	3
	4
	3
	4
	3.5
	3.5
	3
	4
	3.5
	3
	4
	3.5
	4
	3
	3
	4
	3
	4
	3.5
	3
Anthers (mm)	ca. 0.8		ca. 0.6
	ca. 0.8		ca. 0.6
	ca. 0.8		ca. 0.6
	ca. 0.8		ca. 0.6
	ca. 0.8		ca. 0.6
Ovary carpels	5.5 mm		1 mm	2
	5.5		1	3
	5.5		1	2
	5.5		1	2
	5.5		1	2
	5.5		1	2
	5.5		1	2
	5.5		1	2
	5.5		1	2
	5.5		1	2
	5.5		1	2
	5.5		1	2
	5.5		1	2
	5.5		1	3
	5.5		1	2
Follicles (mm)	13
	11
	10
	12
	13
	14
	12
	11
	10
	13
	12
	12
	13
	14
	13
	13
	12
	11
	12
	10
	11
	14
	13
	13
	12
	13
	12
	11
	14
	10
	12
	13
Persistent styles (mm)	2
	2
	2
	2
	2
	2
	2
	2
	2
	2
Seeds		0.7 mm		14
		0.7		14
		0.7		14
		0.7		14
		0.7		15
		0.7		14
		0.7		14
		0.7		15
		0.7		15
		0.7		15
		0.7		14
		0.7		14
		0.7		15
		0.7		14
		0.7		15
		0.7		14
		0.7		15
		0.7		14
		0.7		15
		0.7		14
		0.7		14
		0.7		15
		0.7		15
		0.7		15
		0.7		14
		0.7		14
		0.7		15
		0.7		15
		0.7		14
		0.7		15
		0.7		15
		0.7		14
